# Supplementary material for: Oxysterol Sensing through the Receptor GPR183 Promotes the Lymphoid-Tissue-Inducing Function of Innate Lymphoid Cells and Colonic Inflammation
Source: PubMed Central journal article supplement (PMC5772175; doi:10.1016/j.immuni.2017.11.020), 2018-01-16
Supplement: mmc1.pdf [file mmc1.pdf]

**Supplemental Information**

**Oxysterol Sensing through the Receptor GPR183**

**Promotes the Lymphoid-Tissue-Inducing Function**

**of Innate Lymphoid Cells and Colonic Inflammation**

**Johanna Emgård, Hana Kammoun, Bethania García-Cassani, Julie Chesné, Sara M. Parigi, Jean-Marie Jacob, Hung-Wei Cheng, Elza Evren, Srustidhar Das, Paulo Czarnewski, Natalie Sleiers, Felipe Melo-Gonzalez, Egle Kvedaraite, Mattias Svensson, Elke Scandella, Matthew R. Hepworth, Samuel Huber, Burkhard Ludewig, Lucie Peduto, Eduardo J. Villablanca, Henrique Veiga-Fernandes, João P. Pereira, Richard A. Flavell, and Tim Willinger**

# Figure S1

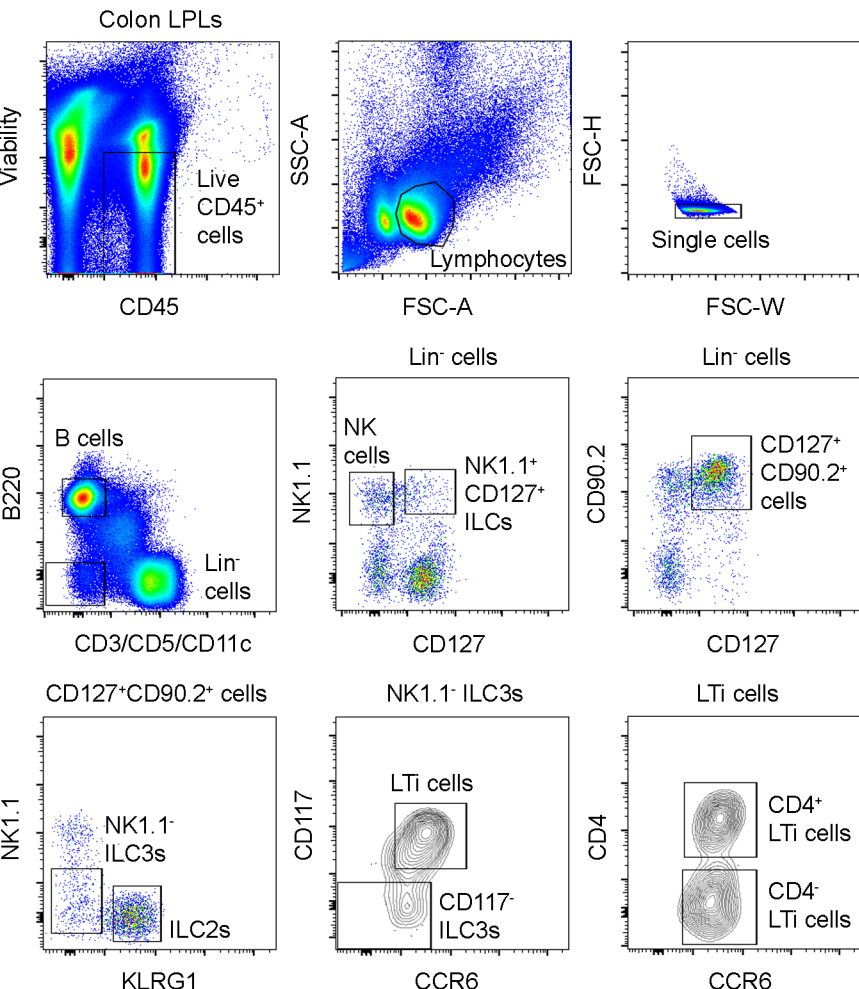

**Figure S1, related to Figure 1: Gating strategy for analyzing GPR183-GFP expression in colonic ILC subsets.**

Lamina propria lymphocytes (LPLs) were isolated from the colon (incl. cecum) of *Gpr183<sup>GFP/+</sup>* mice. After gating on live CD45<sup>+</sup> single lymphocytes, Lineage-negative cells (Lin<sup>-</sup>) were gated as B220<sup>-</sup>CD3<sup>-</sup>CD5<sup>-</sup>CD11c<sup>-</sup> cells and B lymphocytes as B220<sup>+</sup>CD3<sup>-</sup>CD5<sup>-</sup>CD11c<sup>-</sup> cells. ILC subsets were identified as indicated: (1) NK cells (Lin<sup>-</sup>NK1.1<sup>+</sup>CD127<sup>-</sup>); (2) NK1.1<sup>+</sup>CD127<sup>+</sup> ILCs (Lin<sup>-</sup>NK1.1<sup>+</sup>CD127<sup>+</sup>); (3) ILC2s (Lin<sup>-</sup>CD127<sup>+</sup>CD90.2<sup>+</sup>NK1.1<sup>-</sup>KLRG1<sup>+</sup>); (4) NK1.1<sup>-</sup> ILC3s (Lin<sup>-</sup>CD127<sup>+</sup>CD90.2<sup>+</sup>NK1.1<sup>-</sup>KLRG1<sup>-</sup>). NK1.1<sup>-</sup> ILC3s were then divided into CD117<sup>-</sup>CCR6<sup>-</sup> and LTi-like (CD117<sup>+</sup>CCR6<sup>+</sup>) subsets. The latter includes CD4<sup>+</sup> and CD4<sup>-</sup> LTi-like ILC3s. Data are representative of three experiments.

**Figure S2**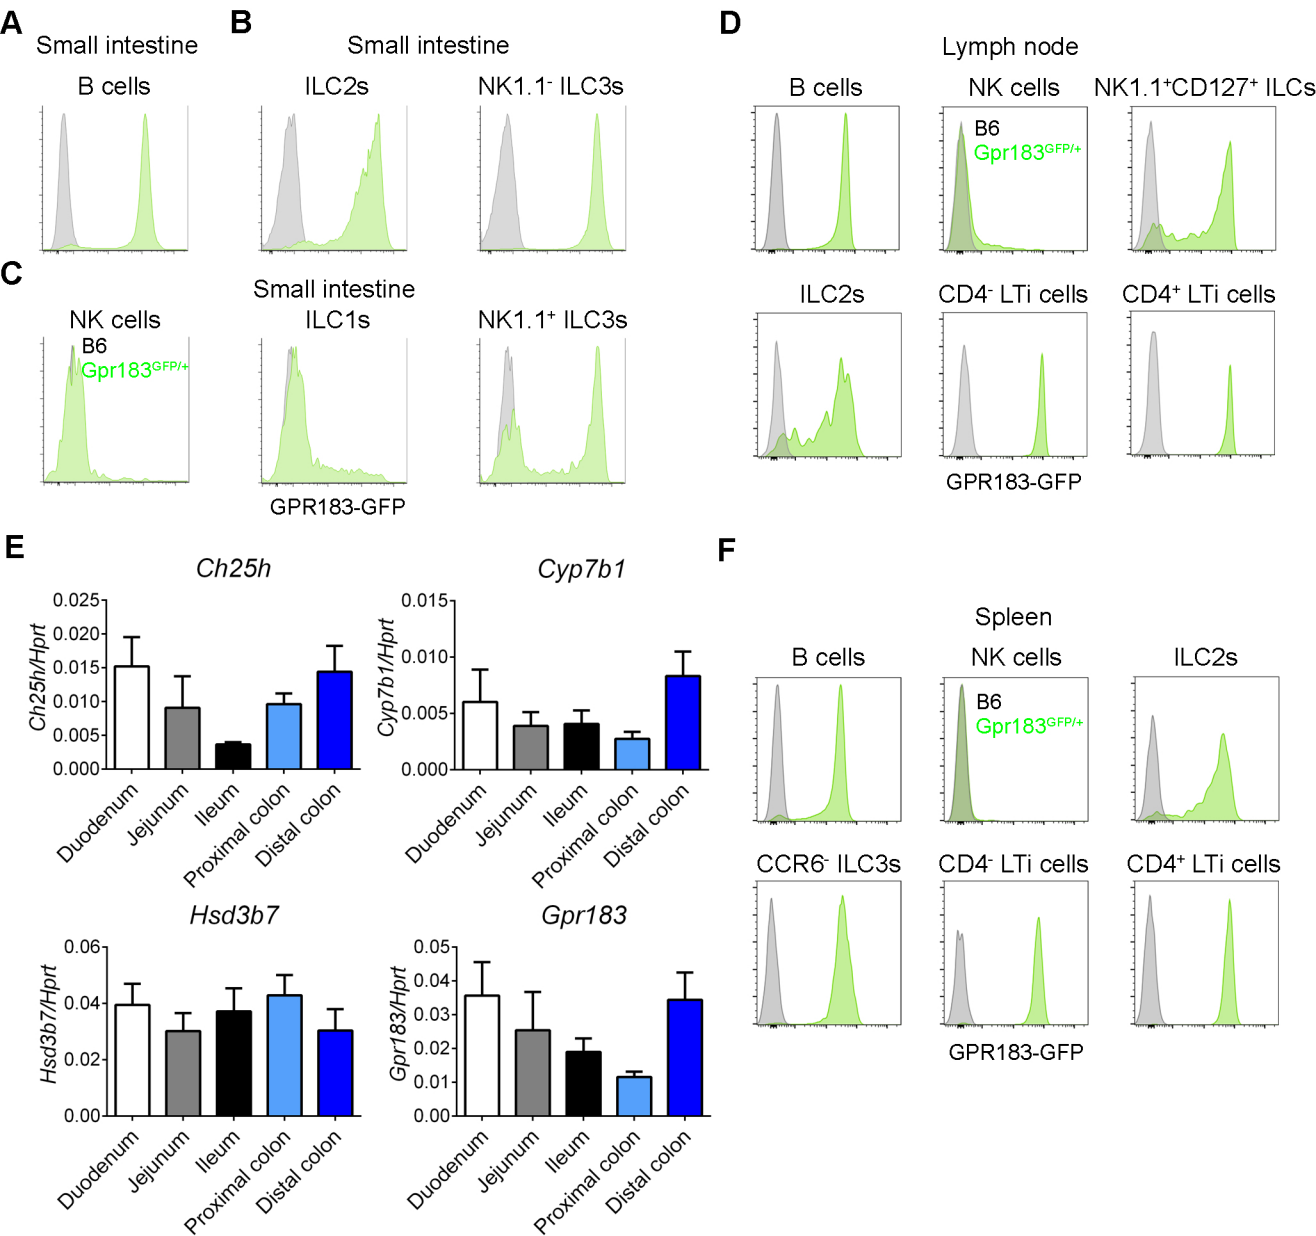

**Figure S2, related to Figure 1: GPR183-GFP expression in small intestine, lymph node, spleen and expression of GR183 ligand-generating enzymes in the small intestine.**

(A-C) GFP expression in lamina propria B cells (A) and ILC subsets (B and C) from the small intestine of *Gpr183<sup>GFP/+</sup>* reporter (green histograms) and B6 control mice (grey histograms). ILC subsets (live CD45<sup>+</sup>Lin<sup>-</sup> lymphocytes) were gated as: (1) NK cells (NK1.1<sup>+</sup>NKp46<sup>+</sup>CD127<sup>-</sup>CD27<sup>+</sup>); (2) ILC1s (NK1.1<sup>+</sup>NKp46<sup>+</sup>CD127<sup>+</sup>CD27<sup>+</sup>); (3) ILC2s (CD127<sup>+</sup>CD90.2<sup>+</sup>NK1.1<sup>-</sup>KLRG1<sup>+</sup>); (4) NK1.1<sup>+</sup> ILC3s (NK1.1<sup>+</sup>NKp46<sup>+</sup>CD127<sup>+</sup>CD27<sup>-</sup>); (5) NK1.1<sup>-</sup> ILC3s (CD127<sup>+</sup>CD90.2<sup>+</sup>NK1.1<sup>-</sup>KLRG1<sup>-</sup>). (D) GFP expression in B cells and ILC subsets from lymph node of *Gpr183<sup>GFP/+</sup>* reporter (green histograms) and B6 control mice (grey histograms). (E) *Ch25h*, *Cyp7b1*, *Hsd3b7*, and *Gpr183* mRNA expression in the indicated regions from the small and large intestine of B6 mice (*n* =8). mRNA expression was normalized to *Hprt*. Data are represented as mean ± SEM. (F) GFP expression in B cells and ILC subsets from spleen of *Gpr183<sup>GFP/+</sup>* reporter (green histograms) and B6 control mice (grey histograms). Data are representative of or combined from two (A, C, E) or three (B, D, F) experiments.

Figure S3

A

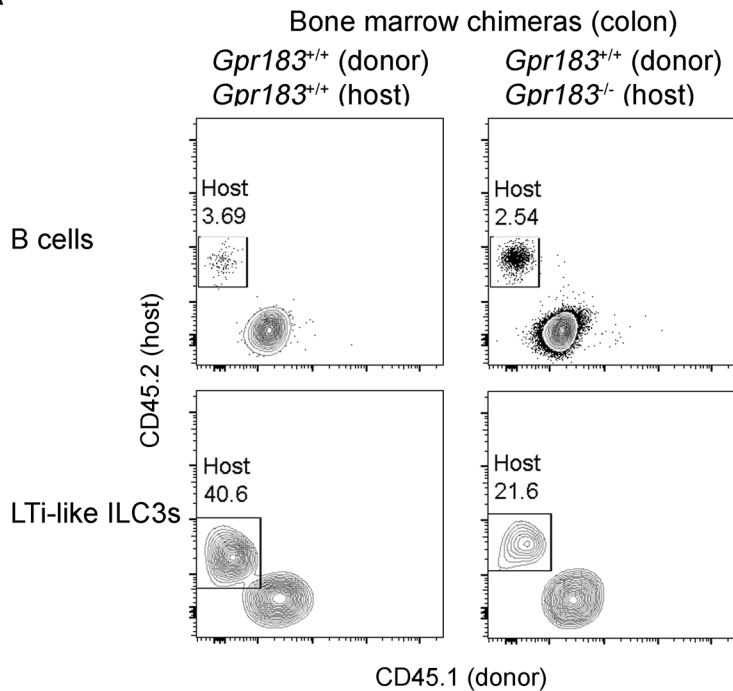

B

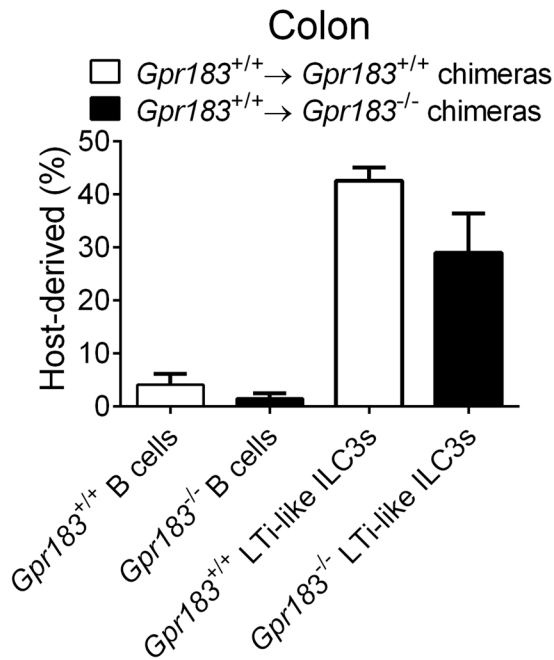

**Figure S3, related to Figure 2: Partial radioresistance of host LTi-like ILC3s in bone marrow chimeras.**

(A and B) B cell and LTi-like ILC3 chimerism in the colon of radiation bone marrow chimeras. Bone marrow cells from B6 mice (CD45.1<sup>+</sup>) were injected into irradiated (2x500 cGy) *Gpr183*<sup>+/+</sup> or *Gpr183*<sup>-/-</sup> recipients (CD45.2<sup>+</sup>) to generate bone marrow chimeras. 2-3 months after reconstitution, the number of colonic SILTs was determined (see Figure 2D) and hematopoietic chimerism assessed by flow cytometry (*n* =2-3). Host-derived B cells and LTi-like ILC3s were identified as CD45.2<sup>+</sup> cells. Data are represented as mean ± SEM. Data are from two experiments.

A

*Rag1*<sup>-/-</sup> mice (colon)

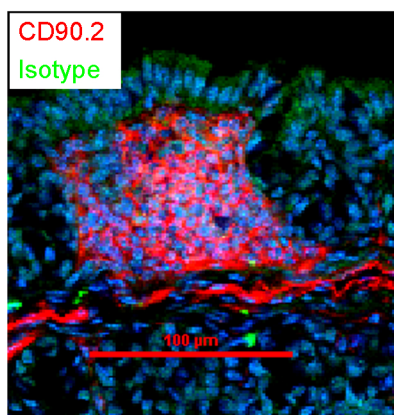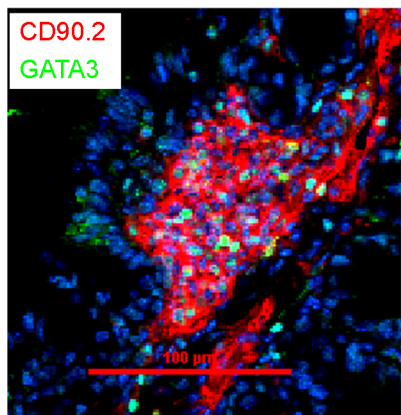

B

*Rorc*( $\gamma$ t)<sup>GFP</sup> *Rag1*<sup>-/-</sup> mice (colon)

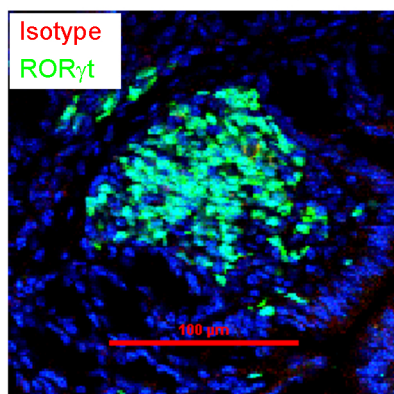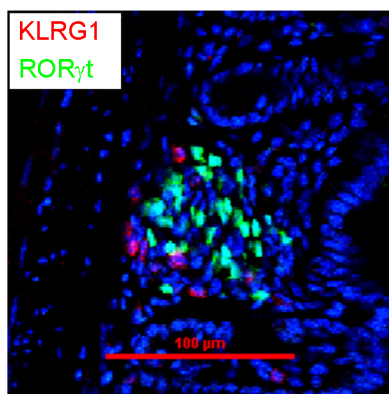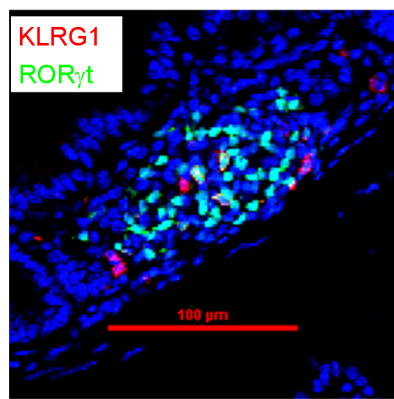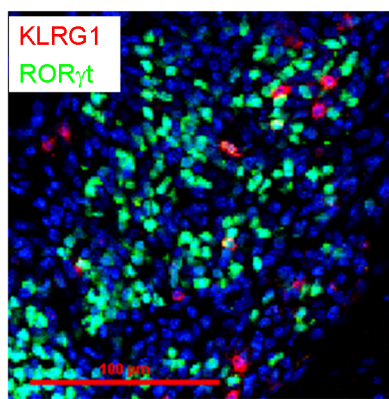



**Figure S4, related to Figure 2: Localization of ILC2s in the colon.**

(A) Colon sections from *Rag1*<sup>-/-</sup> mice were stained with  $\alpha$ -GATA3 or isotype control Ab (green) and co-stained with Ab against CD90.2 (red). (B) Colon sections from *Rorc*( $\gamma$ )<sup>GFP</sup> *Rag1*<sup>-/-</sup> mice were stained with  $\alpha$ -KLRG1 or isotype control Ab (red) and co-stained with Ab against GFP (green). Nuclei are in blue (DAPI). Scale bars (red) are 100  $\mu$ m. Data are from one experiment.

# Figure S5

**A**

Mixed bone marrow chimeras

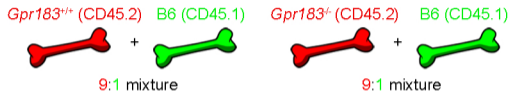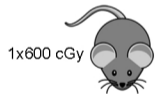

*Rag1*<sup>-/-</sup> (CD45.1) host

2-3 months

Cell distribution in colon

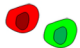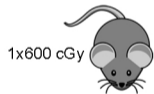

*Rag1*<sup>-/-</sup> (CD45.1) host

2-3 months

Cell distribution in colon

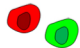**B**

Mixed bone marrow chimeras

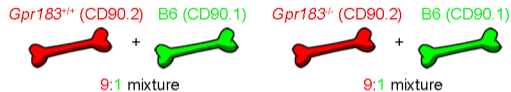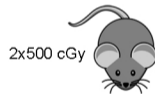

B6 (CD90.1) host

2-3 months

ILC distribution in colon

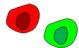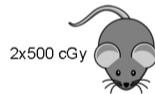

B6 (CD90.1) host

2-3 months

ILC distribution in colon

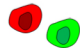**C**

Bone marrow chimeras

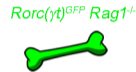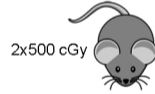

*Ch25h*<sup>+/+</sup> or *Ch25h*<sup>-/-</sup> host

2-3 months

ILC3 distribution in intestine

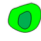

**Figure S5, related to Figure 3: Generation of bone marrow chimeras to assess intestinal ILC positioning in the absence of GPR183 or 7 $\alpha$ ,25-OHC.**

(A) Mixed bone marrow chimeras to determine hematopoietic cell localization. A 9:1 mixture of either *Gpr183*<sup>+/+</sup> (CD45.2<sup>+</sup>)-B6 (CD45.1<sup>+</sup>) or *Gpr183*<sup>-/-</sup> (CD45.2<sup>+</sup>)-B6 (CD45.1<sup>+</sup>) bone marrow cells was injected into irradiated *Rag1*<sup>-/-</sup> recipients (CD45.1<sup>+</sup>). Cell distribution in the colon was determined 2-3 months after transplantation (see Figure 3A). (B) Mixed bone marrow chimeras to examine ILC distribution. Bone marrow chimeras were generated as in (A), using CD90.1-CD90.2 instead of CD45.1-CD45.2 as congenic markers. Localization of *Gpr183*<sup>+/+</sup> and *Gpr183*<sup>-/-</sup> ILCs was determined as shown in Figure 3B. (C) Bone marrow chimeras to assess ILC3 localization in mice lacking the GPR183 ligand 7 $\alpha$ ,25-OHC. Bone marrow cells from *Rag1*-deficient *Rorc*( $\gamma$ )<sup>GFP</sup> transgenic mice were injected into irradiated *Ch25h*<sup>+/+</sup> and *Ch25h*<sup>-/-</sup> recipients to generate bone marrow chimeras. ILC3 distribution in colon (see Figure 3C) and small intestine (see Figure 3D) was determined 2-3 months after transplantation.

**A**

Live CD45<sup>+</sup>Lin<sup>-</sup> cells (colon)

*Gpr183*<sup>+/+</sup> *Gpr183*<sup>-/-</sup>

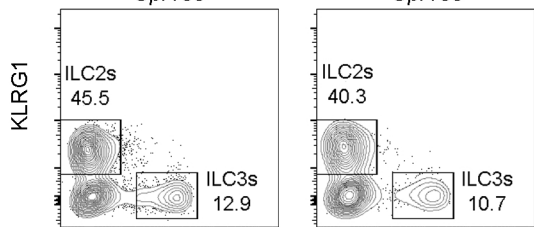

ROR $\gamma$ t

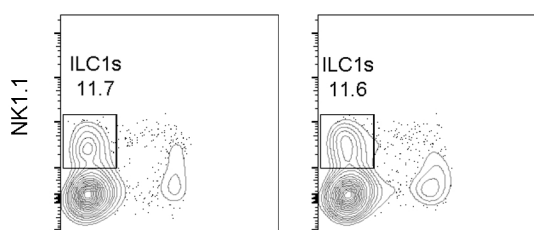

ROR $\gamma$ t

**B**

Colon

Colon

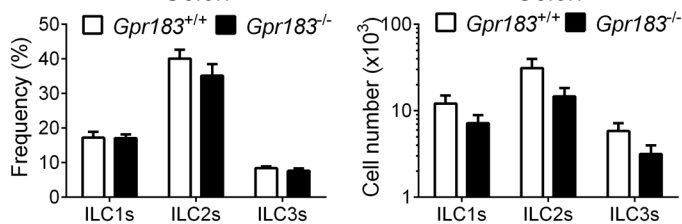

**C**

ILC3s (colon)

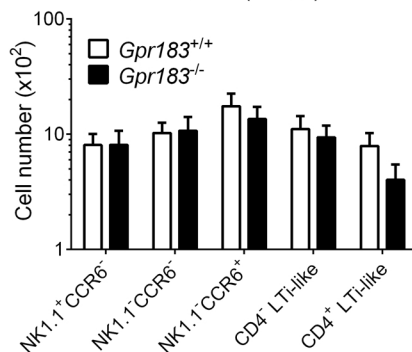

**D**

*Rag1*<sup>-/-</sup> mice (colon)

*Lta*

*Ltb*

*Ahr*

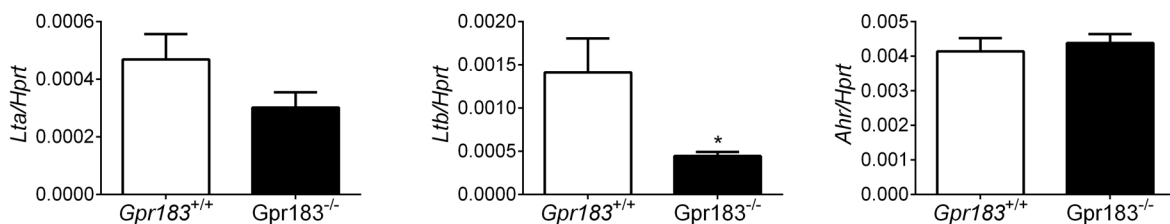

**E**

ILC3s (colon)

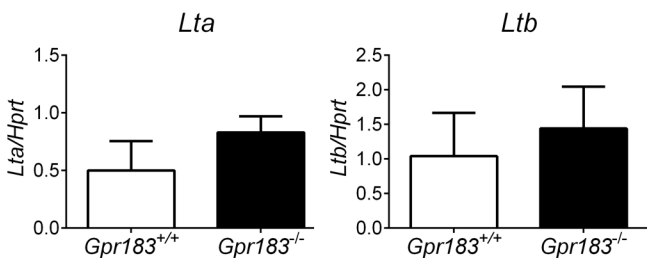

**F**

CD4<sup>+</sup> LTi cells

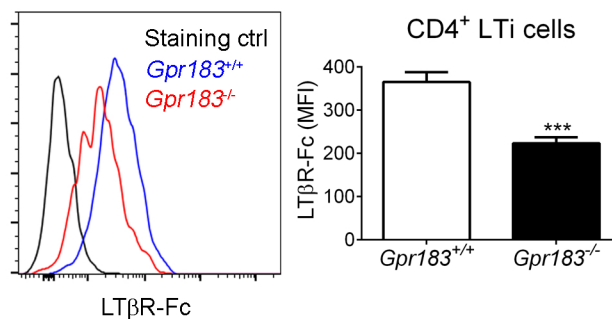

**G**

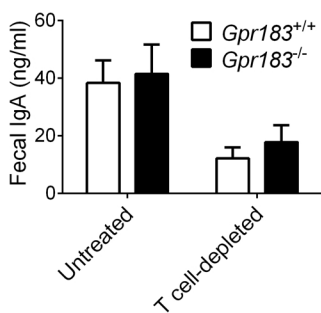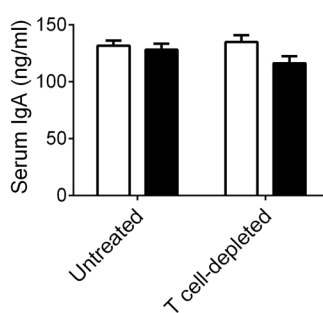

**Figure S6, related to Figure 4: ILC homeostasis, lymphotoxin expression, and IgA production in *Gpr183*-deficient mice.**

(A and B) Frequency and number of ILC subsets in the colon (incl. cecum) of *Gpr183*<sup>+/+</sup> and *Gpr183*<sup>-/-</sup> mice as determined by flow cytometry (*n* =13-15). After gating on live CD45<sup>+</sup>Lin<sup>-</sup> single lymphocytes, ILC1s/NK cells were gated as NK1.1<sup>+</sup>RORγt<sup>-</sup> cells, ILC2s as KLRG1<sup>+</sup>RORγt<sup>-</sup> cells, and ILC3s as RORγt<sup>+</sup>KLRG1<sup>-</sup> cells. (C) Number of ILC3 subsets in the colon (incl. cecum) of *Gpr183*<sup>+/+</sup> and *Gpr183*<sup>-/-</sup> mice was determined by flow cytometry (*n* =9-10). (D) *Lta*, *Ltb*, and *Ahr* mRNA expression in the colon of *Gpr183*<sup>+/+</sup> and *Gpr183*<sup>-/-</sup> mice on a *Rag1*-deficient background (*n* =8-15). mRNA expression was normalized to *Hprt*. (E) *Lta* and *Ltb* mRNA expression in sorted colonic ILC3s from *Gpr183*<sup>+/+</sup> and *Gpr183*<sup>-/-</sup> mice on a *Rag1*-deficient background (*n* =2). (F) LTα<sub>1</sub>β<sub>2</sub> surface expression on *Gpr183*<sup>+/+</sup> and *Gpr183*<sup>-/-</sup> CD4<sup>+</sup> LTi-like ILC3s from mesenteric lymph nodes was detected by staining with LTβR-Fc fusion protein (*n* =5). Black histogram represents background staining (secondary Ab and streptavidin only). (G) IgA concentrations in serum and feces of *Gpr183*<sup>+/+</sup> and *Gpr183*<sup>-/-</sup> mice (*n* =5-13). Mice were either untreated or received α-TCRβ Ab to deplete T cells. Data are represented as mean ± SEM. \*, P <0.05; \*\*\*, P <0.001 by Student's *t* test. Data are representative of or combined from two (E-G), three (D), five (C), or seven (A, B) experiments.

**Figure S7**

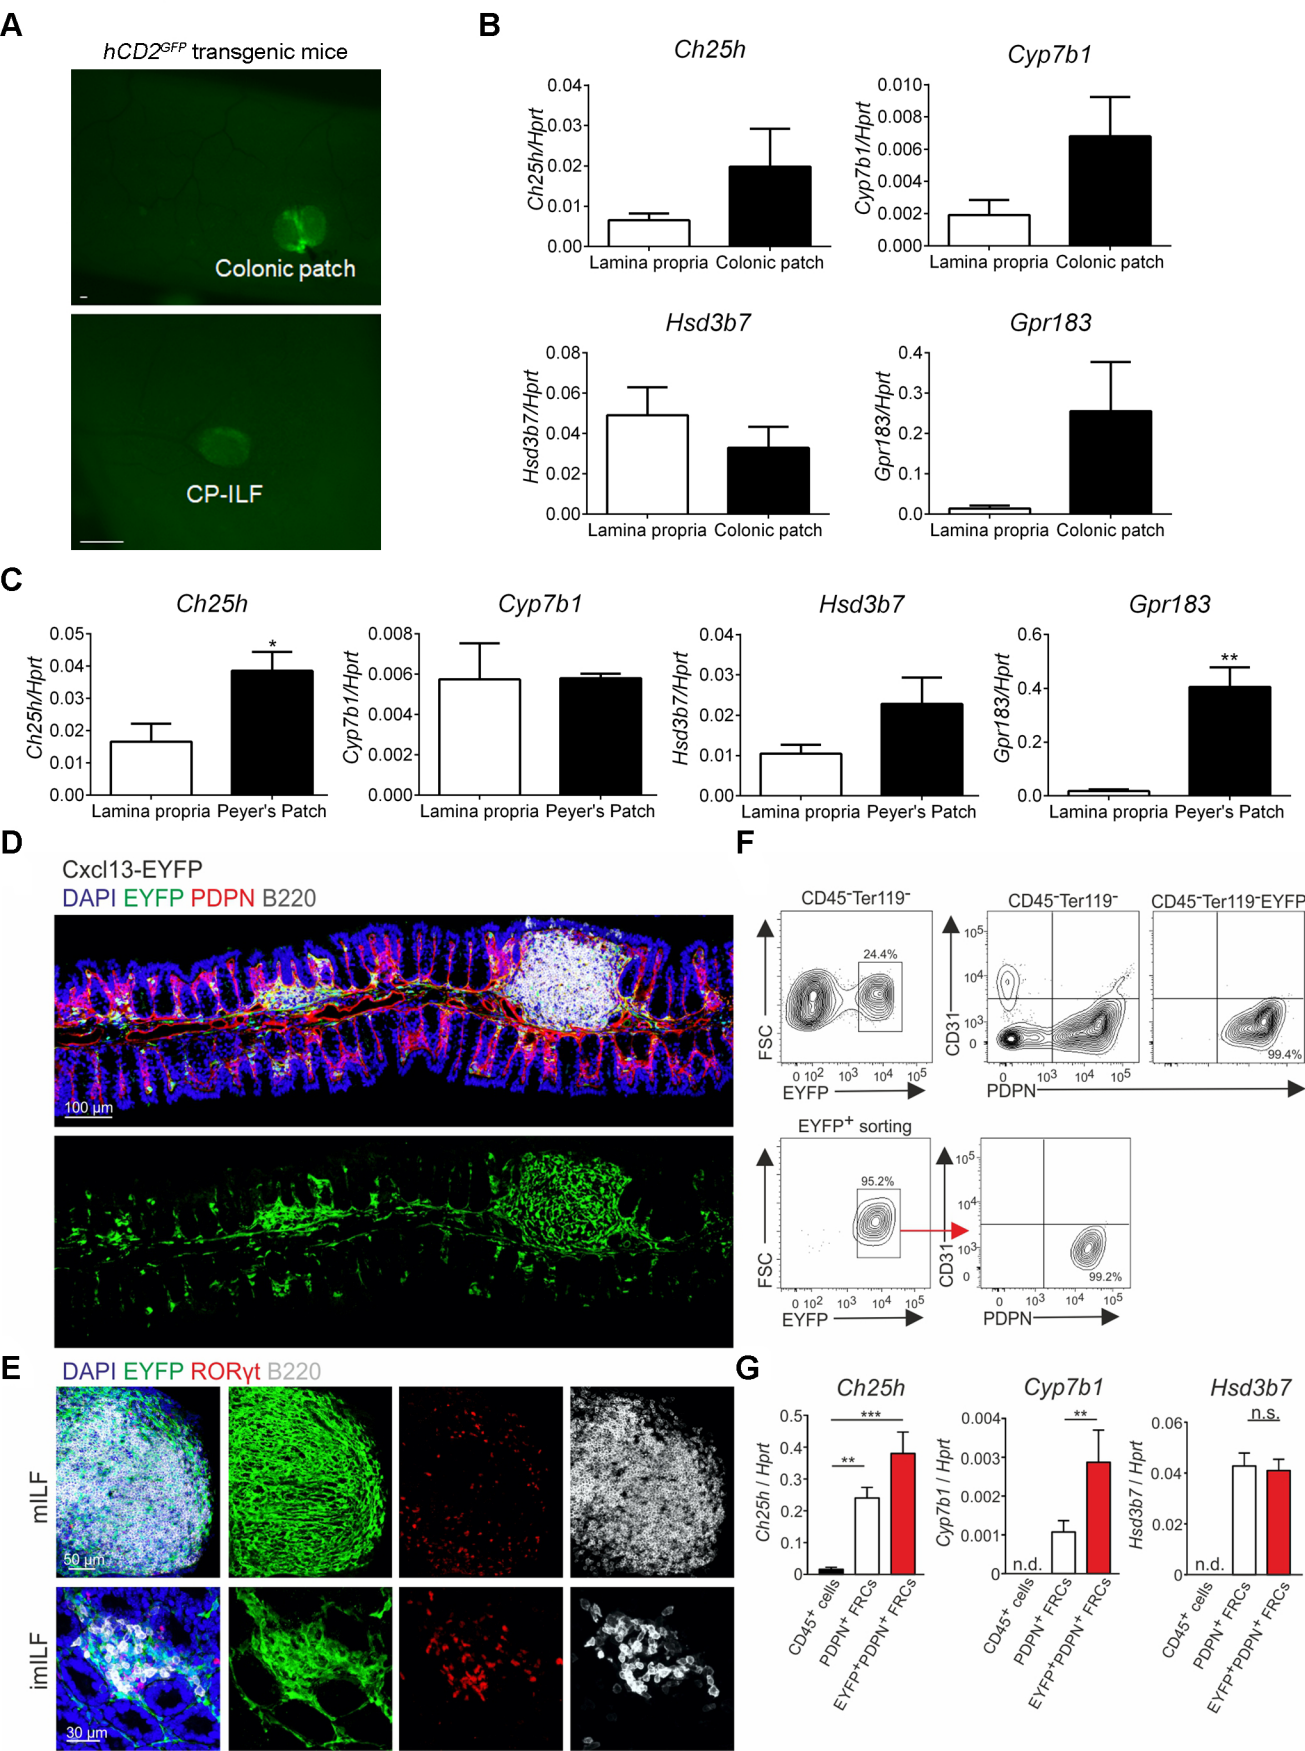

**Figure S7, related to Figure 5 and 6: Expression of GPR183 ligand-generating enzymes in colonic patches, Peyer's Patches, and colonic CXCL13<sup>+</sup> stromal cells.**

(A) Microdissection of colonic lymphoid tissues. Colons were harvested from hCD2<sup>GFP</sup> transgenic mice and GFP<sup>+</sup> lymphoid structures (colonic patch, CP-ILF) were visualized using a fluorescence stereomicroscope. Scale bars (white) are 200  $\mu$ m. (B) *Ch25h*, *Cyp7b1*, *Hsd3b7*, and *Gpr183* mRNA expression in micro-dissected colonic patches from hCD2<sup>GFP</sup> transgenic mice was compared to lamina propria ( $n=6$ ). (C) *Ch25h*, *Cyp7b1*, *Hsd3b7*, and *Gpr183* mRNA expression in Peyer's Patches from human CD2<sup>GFP</sup> transgenic mice was compared to micro-dissected lamina propria ( $n=4$ ). (D) Immunofluorescence microscopy of colon from *Cxcl13*-EYFP reporter mice. EYFP<sup>+</sup> cells (green), Podoplanin (PDPN)<sup>+</sup> cells (red), and B cells (B220<sup>+</sup>, white) are shown. Nuclei were visualized with DAPI (blue). Scale bar (white) is 100  $\mu$ m. (E) Localization of CXCL13-EYFP<sup>+</sup> cells in colonic ILFs. Immature (imILF) and mature (mILF) ILF are shown. Scale bar (white) is 30  $\mu$ m. (F) Phenotype and sorting of CXCL13-EYFP<sup>+</sup> cells from the colon of *Cxcl13*-EYFP reporter mice. (G) *Ch25h*, *Cyp7b1*, and *Hsd3b7* mRNA expression in sorted CD45<sup>+</sup> cells, PDPN<sup>+</sup> fibroblastic reticular cells (FRCs), and CXCL13-EYFP<sup>+</sup> PDPN<sup>+</sup> FRCs from the colon ( $n=5$ ). mRNA expression was normalized to *Hprt*. n.d., not detectable; n.s., not significant. Data are represented as mean  $\pm$  SEM. \*,  $P < 0.05$ ; \*\*,  $P < 0.01$ ; \*\*\*,  $P < 0.001$  by Student's *t* test (C) or one-way ANOVA. Data are representative of or combined from one (C, F, G) or two (B, D, E) experiments.
